# Supplementary material
Source: PubMed Central journal article supplement (PMC3746866)
Supplement: 1312477110_pnas.201312477SI.pdf [file 1312477110_pnas.201312477SI.pdf]

# Supporting Information

Zhang et al. 10.1073/pnas.1312477110

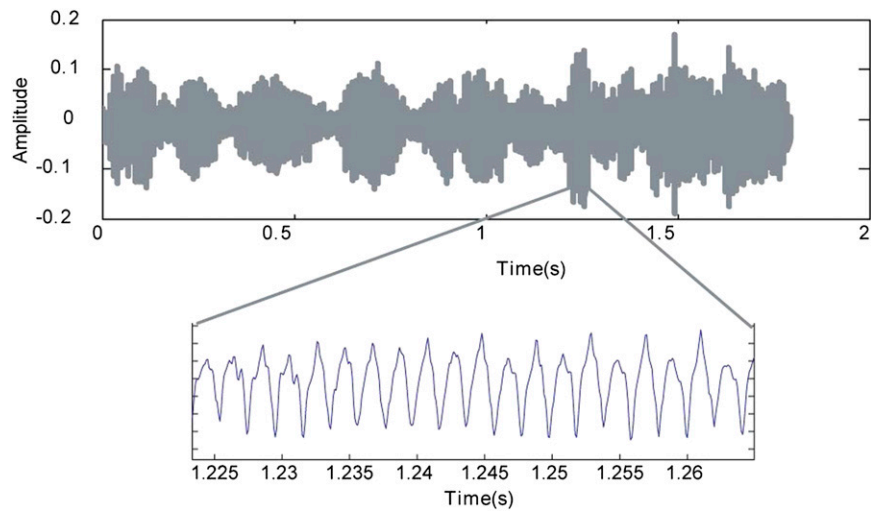

Fig. S1. Waveform retrieved from a 1.8-s-long natural yellow jacket sound by MATLAB software. The *y*-axis represents the sound amplitude. The sound intensity ranged from 55 to 65 dB.

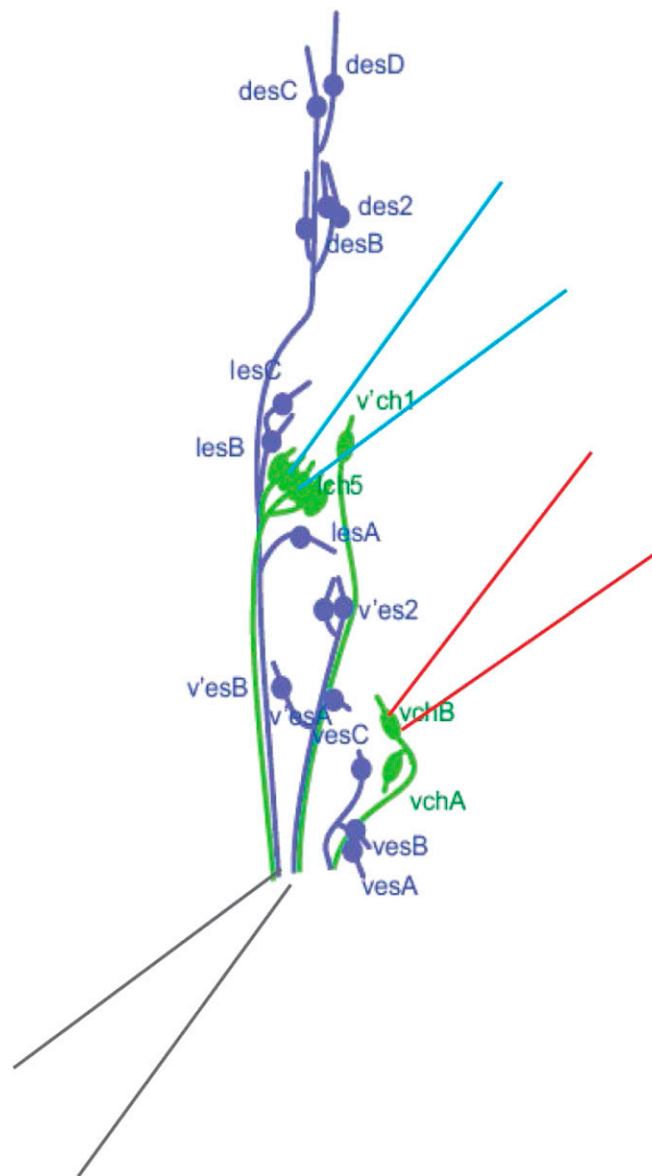

**Fig. S2.** Diagram of Cho neuron recording methods. Green, Cho neurons; magenta, other sensory neurons; red, electrode for a single Cho neuron; cyan, electrode for grouped Cho neurons; gray, electrode for nerve recording.

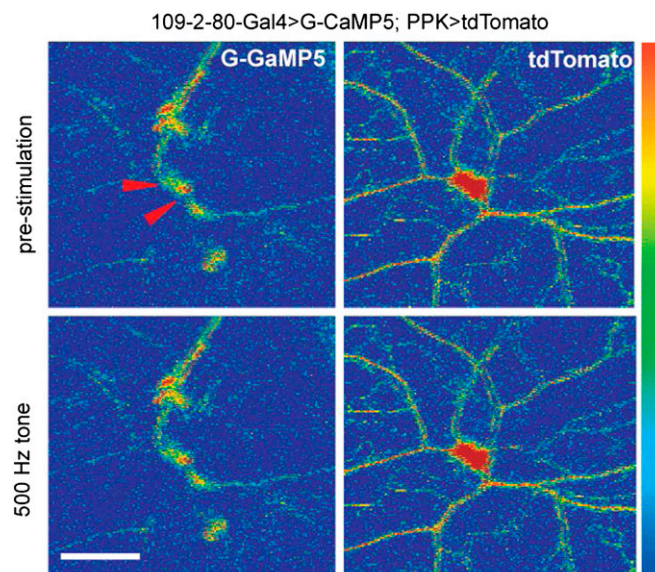

**Fig. 53.** Class IV da neurons (labeled by PPK-Gal4) did not respond to the 500-Hz pure tone. (Left) G-CaMP5 channel showing all da neurons in the cluster. Red arrows indicate the class IV neuron cell bodies. (Right) tdTomato channel by a class IV neuron-specific driver. Both channels are shown with rainbow pseudocolor (range, 1–255). (Scale bar: 20  $\mu\text{m}$ .)

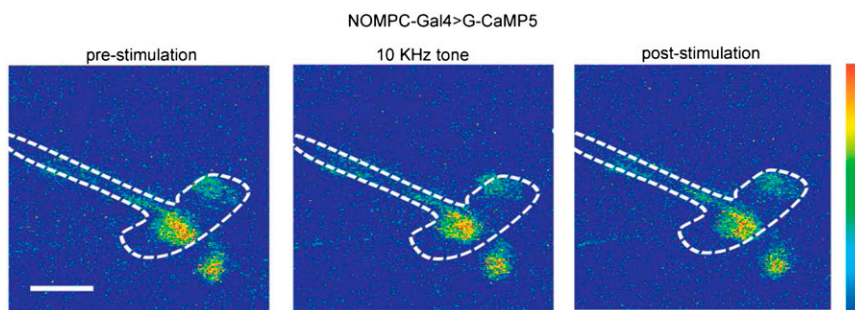

**Fig. 54.** Cho neurons did not respond to a 1-s high-frequency (10 kHz) sound. Pseudocolor shows the G-CaMP signal. (Color range: 1–255; scale bar: 10  $\mu\text{m}$ .)

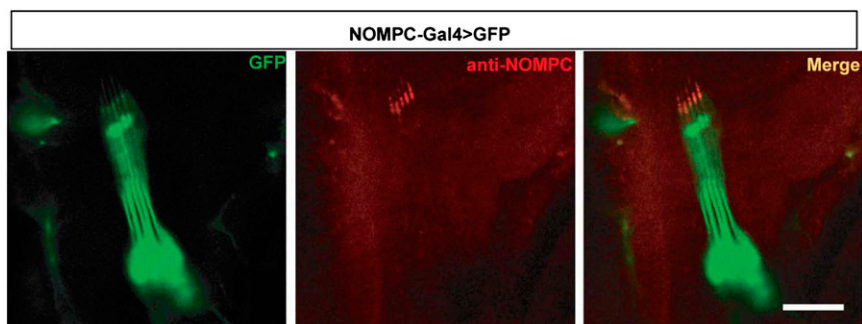

**Fig. 55.** Antibody staining of NOMPC channels on the larval Cho neurons. (Scale bar: 20  $\mu\text{m}$ .)

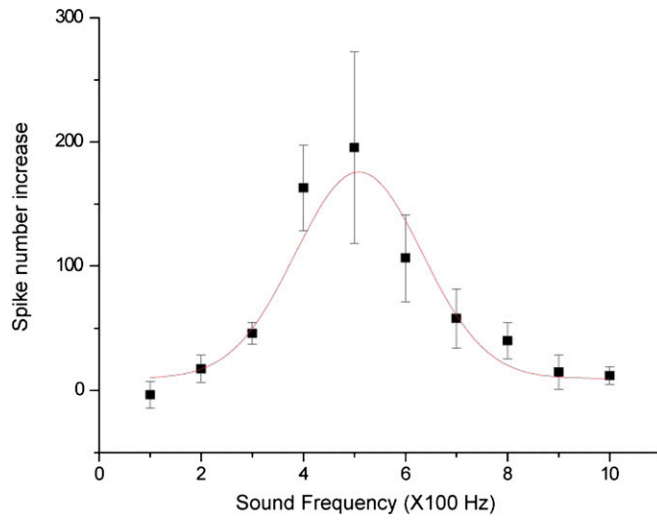

Fig. S6. Tuning curve from recording of Cho neuron activity in *nompC* mutant larvae at a sound intensity of 60 dB. Samples are from seven recordings.

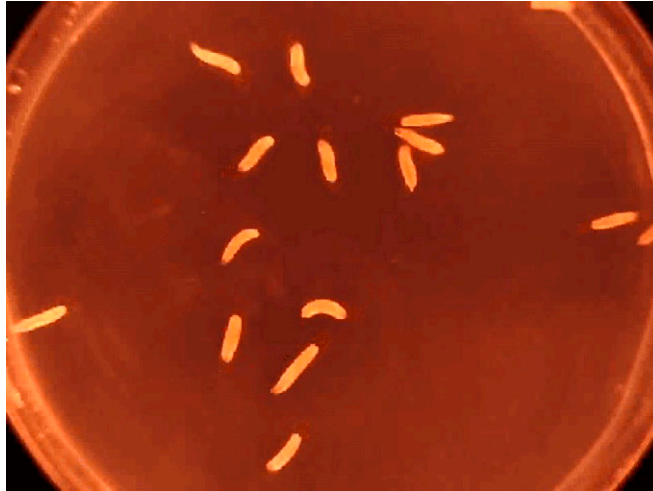

Movie S1. Larval startle response to natural sound from wasps.

[Movie S1](#)

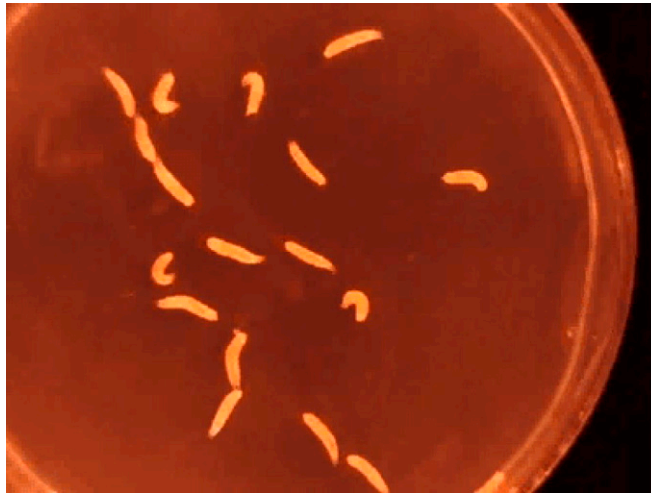

**Movie S2.** Larval startle response to 500-Hz pure tones.

[Movie S2](#)

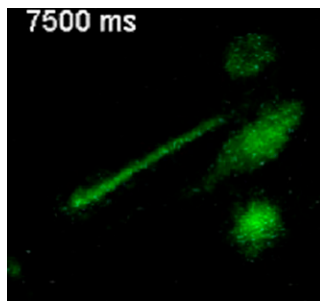

**Movie S3.** Time-lapse movie of  $\text{Ca}^{2+}$  activity in Cho neurons elicited by a 500-Hz pure tone.

[Movie S3](#)
